# Supplementary material
Source: Elsevier journal article supplement (https://cris.unibo.it/retrieve/handle/11585/1047719/d9d59655-5f3d-489c-a4d7-23bc7516e9ae/mmc1.pdf)
Supplement: mmc1 [file mmc1.pdf]

## SUPPLEMENTARY MATERIAL

|                                                                                                                                                                                                               |    |
|---------------------------------------------------------------------------------------------------------------------------------------------------------------------------------------------------------------|----|
| Supplementary Table S1: Clinical features of the study cohort in subgroups by Berden histopathological class and according by induction treatment.....                                                        | 2  |
| Supplementary Table S2: eGFR at baseline, 6 and 12 months and changes in eGFR from baseline at 6 and 12 months in the overall cohort and in groups stratified by Berden histological classes.....             | 6  |
| Supplementary Table S3: eGFR at baseline, 6 and 12 months and changes in eGFR from baseline at 6 and 12 months, according to induction treatment and after stratification by Berden histological classes..... | 7  |
| Supplementary Table S4: Multivariable logistic regression model predicting eGFR recovery 6 months after induction therapy .....                                                                               | 8  |
| Supplementary Table S5: Multivariable Firth's penalized logistic regression models to predict eGFR recovery in patient subgroups by Berden class.....                                                         | 9  |
| Supplementary Table S6: Multivariable Cox regression model with Firth's penalized partial likelihood predicting the kidney failure outcome.....                                                               | 11 |
| Supplementary Table S7: Multivariable Cox regression models with Firth's penalized partial likelihood to predict kidney failure in patient subgroups by Berden class .....                                    | 12 |
| Supplementary Figure S1: Proportions of kidney remission rates at 6 months according to induction immunosuppression in subgroups stratified by Berden histopathological classes .....                         | 13 |
| Supplementary Figure S2: eGFR at baseline, 6 and 12 months after induction in the cohort stratified by Berden histopathological classes .....                                                                 | 14 |
| Supplementary Figure S3: Kaplan Meier curves showing time to the kidney failure outcome in the cohort stratified by Berden histopathological classes.....                                                     | 15 |

## Supplementary Table S1: Clinical features of the study cohort in subgroups by Berden histopathological class and according by induction treatment

Values are reported as mean  $\pm$  standard deviation, median [interquartile range] or count (percentage). P values refer to ANOVA, Kruskal-Wallis Rank Sum Test or Fisher's exact tests, as appropriate, to compare the 3 groups. When these tests reached statistical significance ( $p < 0.05$ ), post-hoc pairwise comparisons were performed. The superscript symbols indicate post-hoc pairwise comparisons with  $p < 0.05$  (with Hommel correction for multiple testing). Absolute numbers (percentages) of missing data are reported in the "missing" column.

### A. Focal class

|                                         | Overall             | CYC                     | RTX                     | RTX-CYC                 | P-value | Missing    |
|-----------------------------------------|---------------------|-------------------------|-------------------------|-------------------------|---------|------------|
| n                                       | 71                  | 39                      | 14                      | 18                      |         |            |
| Age at baseline (years)                 | 62.2 $\pm$ 12.7     | 63.8 $\pm$ 10.5         | 63.6 $\pm$ 15.8         | 57.7 $\pm$ 14.2         | 0.221   | -          |
| Male sex                                | 45 (63.4%)          | 26 (66.7%)              | 11 (78.6%)              | 8 (44.4%)               | 0.127   | -          |
| ANCA specificity                        |                     |                         |                         |                         |         | -          |
| PR3                                     | 37 (52.1%)          | 19 (48.7%)              | 6 (42.9%)               | 12 (66.7%)              | 0.331   |            |
| MPO                                     | 34 (47.9%)          | 20 (51.3%)              | 8 (57.1%)               | 6 (33.3%)               | 0.331   |            |
| PR3 and MPO                             | 1 (1.4%)            | 1 (2.6%)                | 0 (0.0%)                | 0 (0.0%)                | 1       |            |
| Negative                                | 1 (1.5%)            | 1 (2.7%)                | 0 (0.0%)                | 0 (0.0%)                | 1       |            |
| Clinical diagnosis                      |                     |                         |                         |                         |         | -          |
| GPA                                     | 30 (42.3%)          | 15 (38.5%)              | 3 (21.4%) <sup>°</sup>  | 12 (66.7%) <sup>°</sup> | 0.033   |            |
| MPA                                     | 41 (57.7%)          | 24 (61.5%)              | 11 (78.6%) <sup>°</sup> | 6 (33.3%) <sup>°</sup>  | 0.033   |            |
| eGFR (ml/min per 1,73m <sup>2</sup> )   | 41.0 [19.5, 77.0]   | 34.0 [15.0, 79.0]       | 29.0 [15.8, 61.0]       | 53.5 [37.5, 77.5]       | 0.061   | -          |
| Dialysis dependence                     | 5 (7.0%)            | 4 (10.3%)               | 1 (7.1%)                | 0 (0.0%)                | 0.387   | -          |
| Proteinuria (mg/day)                    | 1430.0 $\pm$ 1412.1 | 1315.5 $\pm$ 1558.3     | 1728.4 $\pm$ 1341.5     | 1456.8 $\pm$ 1147.1     | 0.687   | 8 (11.3%)  |
| Hypertension                            | 19 (31.1%)          | 14 (35.9%)              | 2 (14.3%)               | 3 (37.5%)               | 0.302   | 10 (14.1%) |
| BVAS v3                                 | 18.2 $\pm$ 5.6      | 18.0 $\pm$ 6.3          | 15.5 $\pm$ 2.7          | 20.1 $\pm$ 5.1          | 0.106   | 9 (12.7%)  |
| Extrarenal involvement                  |                     |                         |                         |                         |         |            |
| Lung                                    | 39 (54.9%)          | 26 (66.7%) <sup>*</sup> | 3 (21.4%) <sup>*</sup>  | 10 (55.6%)              | 0.014   | -          |
| Peripheral nervous system               | 7 (9.9%)            | 2 (5.1%)                | 1 (7.1%)                | 4 (22.2%)               | 0.131   | -          |
| Central nervous system                  | 3 (4.2%)            | 1 (2.6%)                | 0 (0.0%)                | 2 (11.1%)               | 0.253   | -          |
| Ocular                                  | 7 (9.9%)            | 4 (10.3%)               | 0 (0.0%)                | 3 (16.7%)               | 0.417   | -          |
| Musculoskeletal                         | 13 (18.3%)          | 9 (23.1%)               | 2 (14.3%)               | 2 (11.1%)               | 0.648   | -          |
| Gastrointestinal                        | 4 (5.6%)            | 3 (7.7%)                | 0 (0.0%)                | 1 (5.6%)                | 0.808   | -          |
| Cardiovascular                          | 1 (1.4%)            | 1 (2.6%)                | 0 (0.0%)                | 0 (0.0%)                | 1       | -          |
| ENT                                     | 23 (32.4%)          | 15 (38.5%)              | 3 (21.4%)               | 5 (27.8%)               | 0.517   | -          |
| Skin                                    | 15 (21.1%)          | 8 (20.5%)               | 3 (21.4%)               | 4 (22.2%)               | 1       | -          |
| RTX cumulative dose (g) <sup>a</sup>    | 2.0 [2.0, 2.0]      | -                       | 2.0 [1.9, 2.9]          | 2.0 [2.0, 2.0]          | 0.326   | -          |
| CYC cum dose (g) <sup>b</sup>           | 4.0 [2.2, 6.0]      | 6.0 [3.3, 7.1]          | -                       | 2.2 [2.2- 2.2]          | <0.001  | 6 (10.5%)  |
| PLEX                                    | 12 (28.6%)          | 9 (40.9%)               | 2 (40.0%)               | 1 (6.7%)                | 0.055   | 29 (40.8%) |
| IV glucocorticoids                      | 43 (61.4%)          | 23 (60.5%)              | 13 (92.9%) <sup>°</sup> | 7 (38.9%) <sup>°</sup>  | 0.005   | 1 (1.4%)   |
| IV glucocorticoid dose (g) <sup>c</sup> | 1.5 [1.5, 2.0]      | 1.5 [0.5, 2.0]          | 1.5 [1.5, 3.0]          | 1.5 [1.0, 1.6]          | 0.594   | 2 (4.6%)   |
| Oral glucocorticoids                    | 70 (98.6%)          | 39 (100.0%)             | 14 (100.0%)             | 17 (94.4%)              | 0.451   | -          |
| Starting dose (mg/day) <sup>d</sup>     | 60.0 [40.0, 60.0]   | 60.0 [40.0, 60.0]       | 55.0 [37.5, 60.0]       | 60.0 [60.0, 60.0]       | 0.414   | 4 (5.7%)   |
| Maintenance therapy at 6 months         |                     |                         |                         |                         |         | 11 (18.3%) |
| Azathioprine                            | 26 (43.3%)          | 16 (48.5%)              | 1 (11.1%)               | 9 (50.0%)               | 0.106   |            |
| RTX                                     | 8 (13.3%)           | 4 (12.1%)               | 3 (33.3%)               | 1 (5.6%)                | 0.129   |            |
| CYC                                     | 2 (3.3%)            | 2 (6.1%)                | 0 (0.0%)                | 0 (0.0%)                | 0.429   |            |
| MMF                                     | 3 (5.0%)            | 1 (3.0%)                | 0 (0.0%)                | 2 (11.1%)               | 0.340   |            |
| Glucocorticoids only                    | 17 (28.3%)          | 8 (24.2%)               | 5 (55.6%)               | 4 (22.2%)               | 0.143   |            |
| Combination/other                       | 4 (6.7%)            | 2 (6.1%)                | 0 (0.0%)                | 2 (11.1%)               | 0.540   |            |

## B. Mixed class

|                                         | Overall           | CYC                     | RTX                    | RTX-CYC                 | P-value | Missing    |
|-----------------------------------------|-------------------|-------------------------|------------------------|-------------------------|---------|------------|
| n                                       | 101               | 56                      | 14                     | 31                      |         |            |
| Age at baseline (years)                 | 63.2±12.3         | 62.3±12.1               | 68.9±11.8              | 62.3±12.5               | 0.172   | -          |
| Male sex                                | 60 (59.4%)        | 34 (60.7%)              | 5 (35.7%)              | 21 (67.7%)              | 0.133   | -          |
| ANCA specificity                        |                   |                         |                        |                         |         | -          |
| PR3                                     | 35 (34.7%)        | 18 (32.1%)              | 3 (21.4%)              | 14 (45.2%)              | 0.274   |            |
| MPO                                     | 67 (66.3%)        | 39 (69.6%)              | 12 (85.7%)             | 16 (51.6%)              | 0.069   |            |
| PR3 and MPO                             | 4 (4.0%)          | 3 (5.4%)                | 1 (7.1%)               | 0 (0.0%)                | 0.45    |            |
| negative                                | 3 (3.3%)          | 2 (4.1%)                | 0 (0.0%)               | 1 (3.3%)                | 1       | 3 (3.0%)   |
| Clinical diagnosis                      |                   |                         |                        |                         |         |            |
| GPA                                     | 32 (32.7%)        | 14 (25.9%)              | 4 (28.6%)              | 14 (46.7%)              | 0.158   |            |
| MPA                                     | 66 (67.3%)        | 40 (74.1%)              | 10 (71.4%)             | 16 (53.3%)              | 0.158   |            |
| eGFR (ml/min per 1,73m <sup>2</sup> )   | 19.0 [12.0, 28.0] | 18.0 [10.2, 27.0]       | 18.5 [14.8, 30.2]      | 23.0 [14.5, 33.5]       | 0.149   | -          |
| Dialysis dependence                     | 14 (13.9%)        | 9 (16.1%)               | 2 (14.3%)              | 3 (9.7%)                | 0.72    | -          |
| Proteinuria (mg/day)                    | 2439.8±1923.6     | 2264.1±2074.8           | 2347.8±1479.3          | 2844.5±1800.6           | 0.478   | 16 (15.8%) |
| Hypertension                            | 45 (54.2%)        | 32 (57.1%)              | 8 (57.1%)              | 5 (38.5%)               | 0.509   | 18 (17.8%) |
| BVAS v3                                 | 18.0±5.4          | 18.6±6.0                | 14.5±4.5               | 18.3±4.2                | 0.060   | 5 (4.9%)   |
| Extrarenal involvement                  |                   |                         |                        |                         |         | -          |
| Lung                                    | 47 (46.5%)        | 32 (57.1%) <sup>^</sup> | 6 (42.9%)              | 9 (29.0%) <sup>^</sup>  | 0.04    |            |
| Peripheral nervous system               | 8 (7.9%)          | 6 (10.7%)               | 0 (0.0%)               | 2 (6.5%)                | 0.601   |            |
| Central nervous system                  | 0 (0.0%)          | 0 (0.0%)                | 0 (0.0%)               | 0 (0.0%)                | NA      |            |
| Ocular                                  | 4 (4.0%)          | 2 (3.6%)                | 0 (0.0%)               | 2 (6.5%)                | 0.79    |            |
| Musculoskeletal                         | 17 (16.8%)        | 11 (19.6%)              | 0 (0.0%)               | 6 (19.4%)               | 0.215   |            |
| Gastrointestinal                        | 4 (4.0%)          | 2 (3.6%)                | 1 (7.1%)               | 1 (3.2%)                | 0.614   |            |
| Cardiovascular                          | 0 (0.0%)          | 0 (0.0%)                | 0 (0.0%)               | 0 (0.0%)                | NA      |            |
| ENT                                     | 22 (21.8%)        | 14 (25.0%)              | 3 (21.4%)              | 5 (16.1%)               | 0.625   |            |
| Skin                                    | 12 (11.9%)        | 7 (12.5%)               | 1 (7.1%)               | 4 (12.9%)               | 1       |            |
| RTX cumulative dose (g) <sup>a</sup>    | 2.0 [2.0, 2.0]    | -                       | 2.0 [1.6, 2.0]         | 2.0 [2.0, 2.0]          | 0.12    | 2 (4.4%)   |
| CYC cum dose (g) <sup>b</sup>           | 3.0 [2.2, 6.0]    | 3.6 [3.0, 6.0]          | -                      | 2.2 [2.2, 2.2]          | <0.001  | 5 (5.7%)   |
| PLEX                                    | 11 (15.7%)        | 10 (27.8%)              | 0 (0.0%)               | 1 (3.6%)                | 0.018   | 31 (30.7%) |
| IV glucocorticoids                      | 59 (60.2%)        | 45 (80.4%) <sup>^</sup> | 8 (66.7%) <sup>o</sup> | 6 (20.0%) <sup>^o</sup> | <0.001  | 3 (3.0%)   |
| IV glucocorticoid dose (g) <sup>c</sup> | 1.5 [1.0, 2.2]    | 1.5 [0.7, 2.1]          | 1.5 [1.5, 2.4]         | 1.0 [0.7, 1.5]          | 0.247   | 2 (3.4%)   |
| Oral glucocorticoids                    | 99 (98.0%)        | 55 (98.2%)              | 13 (92.9%)             | 31 (100.0%)             | 0.351   | -          |
| Starting dose (mg/day) <sup>d</sup>     | 60.0 [32.0, 60.0] | 60.0 [32.0, 60.0]       | 60.0 [25.0, 60.0]      | 60.0 [60.0, 60.0]       | 0.789   | 10 (10.1%) |
| Maintenance therapy at 6 months         |                   |                         |                        |                         |         | 10 (9.9%)  |
| Azathioprine                            | 50 (54.9%)        | 28 (54.9%) <sup>*</sup> | 1 (9.1%) <sup>*o</sup> | 21 (72.4%) <sup>o</sup> | 0.002   |            |
| RTX                                     | 3 (3.3%)          | 1 (2.0%)                | 2 (18.2%)              | 0 (0.0%)                | 0.012   |            |
| CYC                                     | 4 (4.4%)          | 4 (7.8%)                | 0 (0.0%)               | 0 (0.0%)                | 0.194   |            |
| MMF                                     | 5 (5.5%)          | 1 (2.0%)                | 0 (0.0%)               | 4 (13.8%)               | 0.057   |            |
| Glucocorticoids only                    | 23 (25.3%)        | 14 (27.5%)              | 6 (54.5%) <sup>o</sup> | 3 (10.3%) <sup>o</sup>  | 0.014   |            |
| Combination/other                       | 6 (6.6%)          | 3 (5.9%)                | 2 (18.2%)              | 1 (3.4%)                | 0.234   |            |

### C. Crescentic class

|                                         | Overall           | CYC                     | RTX                     | RTX-CYC                 | P-value | Missing    |
|-----------------------------------------|-------------------|-------------------------|-------------------------|-------------------------|---------|------------|
| n                                       | 96                | 61                      | 12                      | 23                      |         |            |
| Age at baseline (years)                 | 58.4±13.7         | 60.0±11.1               | 59.5±16.0               | 53.7±17.7               | 0.158   | -          |
| Male sex                                | 56 (58.3%)        | 38 (62.3%)*             | 2 (16.7%)**             | 16 (69.6%)*             | 0.007   | -          |
| ANCA specificity                        |                   |                         |                         |                         |         | -          |
| PR3                                     | 50 (52.1%)        | 30 (49.2%)              | 7 (58.3%)               | 13 (56.5%)              | 0.791   |            |
| MPO                                     | 40 (41.7%)        | 24 (39.3%)              | 6 (50.0%)               | 10 (43.5%)              | 0.753   |            |
| PR3 and MPO                             | 1 (1.0%)          | 0 (0.0%)                | 1 (8.3%)                | 0 (0.0%)                | 0.125   |            |
| Negative                                | 7 (7.6%)          | 7 (12.3%)               | 0 (0.0%)                | 0 (0.0%)                | 0.159   |            |
| Clinical diagnosis                      |                   |                         |                         |                         |         | 1 (1%)     |
| GPA                                     | 46 (48.4%)        | 29 (47.5%)              | 4 (36.4%)               | 13 (56.5%)              | 0.563   |            |
| MPA                                     | 49 (51.6%)        | 32 (52.5%)              | 7 (63.6%)               | 10 (43.5%)              | 0.563   |            |
| eGFR (ml/min per 1,73m <sup>2</sup> )   | 14.0 [5.0, 28.5]  | 11.0 [5.0, 22.0] ^      | 14.5 [6.5, 32.5]        | 23.0 [14.5-40.5] ^      | 0.005   | -          |
| Dialysis dependence                     | 28 (29.2%)        | 24 (39.3%) ^            | 3 (25.0%)               | 1 (4.3%) ^              | 0.003   | -          |
| Proteinuria (mg/day)                    | 2349.8±2425.3     | 2743.8±2885.8           | 2044.6±1646.3           | 1546.8±785.2            | 0.156   | 18 (18.7%) |
| Hypertension                            | 44 (51.2%)        | 31 (51.7%)              | 7 (58.3%)               | 6 (42.9%)               | 0.756   | 10 (10.4%) |
| BVAS v3                                 | 18.6±6.8          | 18.2±6.9                | 17.7±5.4                | 20.0±7.1                | 0.52    | 2 (2.1%)   |
| Extrarenal involvement                  |                   |                         |                         |                         |         |            |
| Lung                                    | 48 (50.0%)        | 33 (54.1%)              | 8 (66.7%)               | 7 (30.4%)               | 0.075   | -          |
| Peripheral nervous system               | 8 (8.3%)          | 3 (4.9%)                | 1 (8.3%)                | 4 (17.4%)               | 0.164   | -          |
| Central nervous system                  | 2 (2.1%)          | 2 (3.3%)                | 0 (0.0%)                | 0 (0.0%)                | 1       | -          |
| Ocular                                  | 2 (2.1%)          | 1 (1.6%)                | 0 (0.0%)                | 1 (4.3%)                | 0.599   | -          |
| Musculoskeletal                         | 22 (22.9%)        | 11 (18.0%)              | 3 (25.0%)               | 8 (34.8%)               | 0.226   | -          |
| Gastrointestinal                        | 4 (4.2%)          | 3 (4.9%)                | 0 (0.0%)                | 1 (4.3%)                | 1       | -          |
| Cardiovascular                          | 2 (2.1%)          | 1 (1.6%)                | 0 (0.0%)                | 1 (4.3%)                | 0.599   | -          |
| ENT                                     | 29 (30.2%)        | 12 (19.7%) ^            | 4 (33.3%)               | 13 (56.5%) ^            | 0.005   | -          |
| Skin                                    | 13 (13.5%)        | 3 (4.9%)*               | 5 (41.7%)*              | 5 (21.7%)               | 0.001   | -          |
| Induction treatment                     |                   |                         |                         |                         |         |            |
| RTX cumulative dose (g) <sup>a</sup>    | 2.0 [2.0, 2.0]    | -                       | 2.0 [1.0, 2.1]          | 2.0 [2.0, 2.0]          | 0.585   | 6 (17.1%)  |
| CYC cum dose (g) <sup>b</sup>           | 3.0 [2.2, 4.9]    | 3.0 [3.0, 6.0]          | -                       | 2.2 [2.2, 2.2]          | <0.001  | 6 (7.1%)   |
| PLEX                                    | 31 (44.9%)        | 25 (59.5%) <sup>^</sup> | 4 (44.4%)               | 2 (11.1%) <sup>^</sup>  | 0.002   | 27 (28.1%) |
| IV glucocorticoids                      | 72 (76.6%)        | 52 (86.7%) <sup>^</sup> | 9 (75.0%)               | 11 (50.0%) <sup>^</sup> | 0.003   | 2 (2.1%)   |
| IV glucocorticoid dose (g) <sup>c</sup> | 1.5 [0.4, 2.1]    | 1.2 [3.7, 2.2]          | 1.5 [1.5, 1.5]          | 1.5 [1.5, 1.9]          | 0.115   | 4 (5.5%)   |
| Oral glucocorticoids                    | 92 (98.9%)        | 59 (98.3%)              | 12 (100.0%)             | 21 (100.0%)             | 1       | 3 (3.1%)   |
| Starting dose (mg/day) <sup>d</sup>     | 60.0 [32.0, 60.0] | 50.0 [32.0, 60.0]       | 50.0 [30.0, 60.0]       | 60.0 [60.0, 60.0]       | 0.236   | 12 (13%)   |
| Maintenance therapy at 6 months         |                   |                         |                         |                         |         | 15 (15.6%) |
| Azathioprine                            | 45 (55.6%)        | 33 (66.0%)*             | 1 (10.0%)*              | 11 (52.4%)              | 0.005   |            |
| RTX                                     | 9 (11.1%)         | 0 (0.0%)* <sup>^</sup>  | 4 (40.0%)*              | 5 (23.8%) <sup>^</sup>  | <0.001  |            |
| CYC                                     | 6 (7.4%)          | 6 (12.0%)               | 0 (0.0%)                | 0 (0.0%)                | 0.134   |            |
| MMF                                     | 6 (7.4%)          | 3 (6.0%)                | 0 (0.0%)                | 3 (14.3%)               | 0.302   |            |
| Glucocorticoids only                    | 11 (13.6%)        | 4 (8.0%)*               | 5 (50.0%)* <sup>o</sup> | 2 (9.5%) <sup>o</sup>   | 0.002   |            |
| Combination/other                       | 4 (4.9%)          | 4 (8.0%)                | 0 (0.0%)                | 0 (0.0%)                | 0.271   |            |

#### D. Sclerotic

|                                         | Overall           | CYC               | RTX               | RTX-CYC           | P-value | Missing    |
|-----------------------------------------|-------------------|-------------------|-------------------|-------------------|---------|------------|
| n                                       | 36                | 22                | 12                | 2                 |         |            |
| Age at baseline (years)                 | 60.2±16.4         | 57.1±16.7         | 65.9±16.3         | 62.5±3.5          | 0.351   | 1 (2.8%)   |
| Male sex                                | 20 (55.6%)        | 9 (40.9%)*        | 10 (83.3%)*       | 1 (50.0%)         | 0.037   | -          |
| ANCA specificity                        |                   |                   |                   |                   |         | -          |
| PR3                                     | 10 (27.8%)        | 4 (18.2%)         | 5 (41.7%)         | 1 (50.0%)         | 0.222   |            |
| MPO                                     | 24 (66.7%)        | 16 (72.7%)        | 7 (58.3%)         | 1 (50.0%)         | 0.518   |            |
| PR3 and MPO                             | 0 (0.0%)          | 0 (0.0%)          | 0 (0.0%)          | 0 (0.0%)          | NA      |            |
| Negative                                | 2 (5.6%)          | 2 (9.1%)          | 0 (0.0%)          | 0 (0.0%)          | 0.581   |            |
| Clinical diagnosis                      |                   |                   |                   |                   |         | 2 (5.6%)   |
| GPA                                     | 8 (23.5%)         | 4 (20.0%)         | 3 (25.0%)         | 1 (50.0%)         | 0.539   |            |
| MPA                                     | 26 (76.5%)        | 16 (80.0%)        | 9 (75.0%)         | 1 (50.0%)         | 0.539   |            |
| eGFR (ml/min per 1,73m <sup>2</sup> )   | 19.0 [12.8, 24.2] | 20.0 [13.8, 27.2] | 17.5 [11.0, 24.0] | 12.0 [8.5, 15.5]  | 0.513   | -          |
| Dialysis dependence                     | 7 (19.4%)         | 3 (13.6%)         | 3 (25.0%)         | 1 (50.0%)         | 0.285   | -          |
| Proteinuria (mg/day)                    | 1864.4±1605.1     | 1773.6±1729.2     | 1642.5±1368.0     | 3524.0±0.0        | 0.322   | 9 (25%)    |
| Hypertension                            | 17 (47.2%)        | 15 (68.2%)*       | 2 (16.7%)*        | 0 (0.0%)          | 0.005   | -          |
| BVAS v3                                 | 15.2±4.9          | 16.3±4.4          | 12.5±4.9          | 22.0              | NA      | 4 (11.1%)  |
| Extrarenal involvement                  |                   |                   |                   |                   |         |            |
| Lung                                    | 9 (25.0%)         | 5 (22.7%)         | 2 (16.7%)         | 2 (100.0%)        | 0.091   | -          |
| Peripheral nervous system               | 3 (8.3%)          | 2 (9.1%)          | 1 (8.3%)          | 0 (0.0%)          | 1       | -          |
| Central nervous system                  | 0 (0.0%)          | 0 (0.0%)          | 0 (0.0%)          | 0 (0.0%)          | NA      | -          |
| Ocular                                  | 1 (2.8%)          | 0 (0.0%)          | 1 (8.3%)          | 0 (0.0%)          | 0.389   | -          |
| Musculoskeletal                         | 7 (19.4%)         | 3 (13.6%)         | 3 (25.0%)         | 1 (50.0%)         | 0.285   | -          |
| Gastrointestinal                        | 2 (5.6%)          | 2 (9.1%)          | 0 (0.0%)          | 0 (0.0%)          | 0.581   | -          |
| Cardiovascular                          | 0 (0.0%)          | 0 (0.0%)          | 0 (0.0%)          | 0 (0.0%)          | NA      | -          |
| ENT                                     | 3 (8.3%)          | 1 (4.5%)          | 1 (8.3%)          | 1 (50.0%)         | 0.193   | -          |
| Skin                                    | 3 (8.3%)          | 2 (9.1%)          | 0 (0.0%)          | 1 (50.0%)         | 0.119   | -          |
| Induction treatment                     |                   |                   |                   |                   |         |            |
| RTX cumulative dose (g) <sup>a</sup>    | 2.0 [1.0, 2.5]    | -                 | 1.9 [1.0, 2.7]    | 2.0 [2.0, 2.0]    | 0.788   | 1 (7.1%)   |
| CYC cum dose (g) <sup>b</sup>           | 3.0 [3.0, 4.5]    | 3.0 [3.0, 3.7]    | -                 | 6.8 [5.5-8.0]     | 0.063   | 3 (12.5%)  |
| PLEX                                    | 2 (10.5%)         | 2 (12.5%)         | 0 (0.0%)          | 0 (0%)            | 1       | 17 (47.2%) |
| IV glucocorticoids                      | 23 (69.7%)        | 17 (81.0%)        | 5 (50.0%)         | 1 (50.0%)         | 0.182   | 3 (8.3%)   |
| IV glucocorticoid dose (g) <sup>c</sup> | 1.0 [0.4, 1.5]    | 0.4 [0.4, 1.5]    | 3.0 [1.5, 3.0]    | 2.0 [2.0, 2.0]    | 0.007   | -          |
| Oral glucocorticoids                    | 34 (97.1%)        | 20 (95.2%)        | 12 (100.0%)       | 2 (100.0%)        | 1       | 1 (2.8%)   |
| Starting dose (mg/day) <sup>d</sup>     | 40.0 [32.0, 60.0] | 36.0 [32.0, 60.0] | 60.0 [40.0, 60.0] | 50.0 [45.0, 55.0] | 0.769   | 3 (8.8%)   |
| Maintenance therapy at 6 months         |                   |                   |                   |                   |         | 9 (25%)    |
| Azathioprine                            | 13 (48.1%)        | 11 (68.8%)*       | 1 (11.1%)*        | 1 (50.0%)         | 0.022   |            |
| RTX                                     | 1 (3.7%)          | 0 (0.0%)          | 1 (11.1%)         | 0 (0.0%)          | 0.354   |            |
| CYC                                     | 1 (3.7%)          | 1 (6.2%)          | 0 (0.0%)          | 0 (0.0%)          | 0.700   |            |
| MMF                                     | 0 (0.0%)          | 0 (0.0%)          | 0 (0.0%)          | 0 (0.0%)          | NA      |            |
| Glucocorticoids only                    | 10 (37.0%)        | 3 (18.8%)         | 6 (66.7%)         | 1 (50.0%)         | 0.054   |            |
| Combination/other                       | 2 (7.4%)          | 1 (6.2%)          | 1 (11.1%)         | 0 (0.0%)          | 0.831   |            |

Abbreviations: ANCA: antineutrophil cytoplasmic antibody; BVAS v3: Birmingham Vasculitis Activity Score version 3; CYC: cyclophosphamide; eGFR: estimated glomerular filtration rate; ENT: Ear, Nose and Throat; GPA: granulomatosis with polyangiitis; IV: intravenous; MPA: microscopic polyangiitis; MPO: myeloperoxidase; PLEX: Plasma Exchange; PR3: proteinase 3; RTX: rituximab; RTX-CYC: Rituximab plus Cyclophosphamide

\*P value < 0,05 CYC vs RTX ; ^ P value < 0,05 CYC vs RTX-CYC; ° P value < 0,05 RTX vs RTX-CYC

a. Refers only to patients treated with RTX

b. Refers only to patients treated with CYC

c. Refers only to patients treated with IV glucocorticoids

d. Refers only to patients treated with oral glucocorticoids

**Supplementary Table S2: eGFR at baseline, 6 and 12 months and changes in eGFR from baseline at 6 and 12 months in the overall cohort and in groups stratified by Berden histological classes**

Data are reported as median (IQR). P values in the last column refer to Kruskal-Wallis rank sum test to compare the groups. When this test reached statistical significance ( $p < 0.05$ ), post-hoc pairwise Wilcoxon tests (with Hommel's correction for multiple testing) were performed. Statistically significant ( $p < 0.05$ ) pairwise comparisons are indicated by superscript symbols.

Paired Wilcoxon test p-values comparing eGFR at 6 or 12 months vs baseline were significant ( $p < 0.05$ ) in all cases, except sclerotic class at 6 months.

| Patient cohort       | All                  | n   | Focal                               | n  | Mixed                              | n   | Crescentic                         | n  | Sclerotic                           | n  | P-value |
|----------------------|----------------------|-----|-------------------------------------|----|------------------------------------|-----|------------------------------------|----|-------------------------------------|----|---------|
| Baseline eGFR        | 20.0<br>(11.0, 35.2) | 304 | 41.0<br>(19.5, 77.0) <sup>#o•</sup> | 71 | 19.0<br>(12.0, 28.0) <sup>#</sup>  | 101 | 14.0<br>(5.0, 28.5) <sup>o</sup>   | 96 | 19.0<br>(12.8, 24.2) <sup>*</sup>   | 36 | <0.001  |
| 6-month eGFR         | 39.0<br>(23.0, 55.0) | 261 | 53.0<br>(40.2, 82.5) <sup>#o•</sup> | 60 | 34.0<br>(21.0, 48.0) <sup>#□</sup> | 89  | 41.5<br>(23.8, 57.2) <sup>o^</sup> | 84 | 18.5<br>(11.8, 28.0) <sup>*^□</sup> | 28 | <0.001  |
| 12-month eGFR        | 40.0<br>(24.5, 58.5) | 251 | 57.0<br>(41.0, 80.0) <sup>#o•</sup> | 59 | 35.5<br>(22.0, 50.0) <sup>#□</sup> | 90  | 41.0<br>(25.0, 58.2) <sup>o^</sup> | 76 | 22.5<br>(17.0, 29.2) <sup>*^□</sup> | 26 | <0.001  |
| Delta eGFR 6 months  | 12.0<br>(0.0, 25.0)  | 261 | 11.0<br>(-5.2, 23.0) <sup>o</sup>   | 60 | 11.0<br>(1.0, 21.0) <sup>*□</sup>  | 89  | 21.0<br>(7.0, 36.0) <sup>**^</sup> | 84 | 0.5<br>(-1.2, 9.0) <sup>^□</sup>    | 28 | <0.001  |
| Delta eGFR 12 months | 13.0<br>(0.5, 28.0)  | 251 | 11.0<br>(-7.0, 27.5) <sup>o</sup>   | 59 | 12.5<br>(1.0, 21.0) <sup>*□</sup>  | 90  | 22.5<br>(8.0, 36.5) <sup>**^</sup> | 76 | 2.0<br>(-0.8, 9.2) <sup>^□</sup>    | 26 | <0.001  |

Abbreviations: eGFR-estimated glomerular filtration rate.

\*P value < 0.05 crescentic vs mixed ; ^P value < 0.05 crescentic vs sclerotic; °P value < 0.05 crescentic vs focal; # P value < 0.05 focal vs mixed; \*P value < 0.05 focal vs sclerotic; □P value < 0.05 mixed vs sclerotic

### Supplementary Table S3: eGFR at baseline, 6 and 12 months and changes in eGFR from baseline at 6 and 12 months, according to induction treatment and after stratification by Berden histological classes

eGFR and changes in eGFR from baseline are reported as median (IQR), stratified by Berden class: (A) focal, (B) mixed, (C) crescentic, (D) sclerotic. The “n” columns report sample sizes of the subgroups at the different time points. P-values in the last column refer to Kruskal-Wallis rank sum test to compare the groups. When these tests reached statistical significance ( $p < 0.05$ ), post-hoc pairwise comparisons were performed. Pairwise comparisons with  $p < 0.05$  after applying Hommel’s correction for multiple testing are flagged with the superscript symbols. # refers to Wilcoxon signed rank test  $p < 0.05$  when performing paired comparisons between eGFR values at 6/12 months and baseline eGFR values

#### A. Focal class

| Patient cohort       | Total             | n  | CYC                            | n  | RTX               | n  | RTX-CYC           | n  | P-value |
|----------------------|-------------------|----|--------------------------------|----|-------------------|----|-------------------|----|---------|
| Baseline eGFR        | 41.0 (19.5, 77.0) | 71 | 34.0 (15.0, 79.0)              | 39 | 29.0 (15.8, 61.0) | 14 | 53.5 (37.5, 77.5) | 18 | 0.061   |
| 6-months eGFR        | 53.0 (40.2, 82.5) | 60 | 51.0 (35.0, 78.0) <sup>#</sup> | 34 | 52.0 (41.8, 73.2) | 8  | 75.0 (48.5, 87.8) | 18 | 0.170   |
| 12-months eGFR       | 57.0 (41.0, 80.0) | 59 | 49.0 (36.5, 75.0) <sup>#</sup> | 35 | 67.0 (42.0, 72.0) | 11 | 73.0 (55.0, 88.0) | 13 | 0.187   |
| Delta eGFR 6 months  | 11 (-5.2, 23.0)   | 60 | 10.5 (1.2, 21.0)               | 34 | 22.5 (-5.0, 38.8) | 8  | 10.5 (-8.0, 19.2) | 18 | 0.556   |
| Delta eGFR 12 months | 11 (-7.0, 27.5)   | 59 | 12.0 (-5.5, 26.0)              | 35 | 21.0 (-2.0, 37.0) | 11 | 9.0 (-8.0, 19.0)  | 13 | 0.621   |

#### B. Mixed class

| Patient cohort       | Total             | n   | CYC                            | n  | RTX               | n  | RTX-CYC                        | n  | P-value |
|----------------------|-------------------|-----|--------------------------------|----|-------------------|----|--------------------------------|----|---------|
| Baseline eGFR        | 19.0 (12.0, 28.0) | 101 | 18.0 (10.2, 27.0)              | 56 | 18.5 (14.8, 30.2) | 14 | 23.0 (14.5, 33.5)              | 31 | 0.149   |
| 6-months eGFR        | 34.0 (21.0, 48.0) | 89  | 32.0 (21.0, 47.0) <sup>#</sup> | 49 | 42.0 (14.0, 50.5) | 11 | 36.0 (24.0, 51.0) <sup>#</sup> | 29 | 0.586   |
| 12-months eGFR       | 35.5 (22.0, 50.0) | 90  | 32.5 (21.5, 47.2) <sup>#</sup> | 48 | 34.0 (17.5, 50.0) | 11 | 39.0 (24.5, 59.0) <sup>#</sup> | 31 | 0.418   |
| Delta eGFR 6 months  | 11.0 (1.0, 21.0)  | 89  | 13.0 (3.0, 21.0)               | 49 | 0.0 (-3.0, 16.0)  | 11 | 7.0 (1.0, 19.0)                | 29 | 0.098   |
| Delta eGFR 12 months | 12.5 (1.0, 21.0)  | 90  | 14.0 (2.0, 26.5)               | 48 | 3.0 (-0.5, 15.0)  | 11 | 9.0 (1.0, 20.5)                | 31 | 0.355   |

#### C. Crescentic class

| Patient cohort       | Total             | n  | CYC                            | n  | RTX               | n  | RTX-CYC                        | n  | P-value |
|----------------------|-------------------|----|--------------------------------|----|-------------------|----|--------------------------------|----|---------|
| Baseline eGFR        | 14.0 (5.0, 28.5)  | 96 | 11.0 (5.0, 22.0) <sup>°</sup>  | 61 | 14.5 (6.5, 32.5)  | 12 | 23.0 (14.5, 40.5) <sup>°</sup> | 23 | 0.005   |
| 6-months eGFR        | 41.5 (23.8, 57.2) | 84 | 40.0 (22.8, 56.2) <sup>#</sup> | 52 | 26.0 (14.5, 52.5) | 11 | 48.0 (33.0, 62.0) <sup>#</sup> | 21 | 0.163   |
| 12-months eGFR       | 41.0 (25.0, 58.2) | 76 | 42.0 (25.0, 58.5) <sup>#</sup> | 47 | 25.0 (16.0, 54.0) | 9  | 49.0 (29.8, 66.2) <sup>#</sup> | 20 | 0.212   |
| Delta eGFR 6 months  | 21.0 (7.0, 36.0)  | 84 | 21.5 (9.0, 36.2)               | 52 | 11.0 (-7.5, 28.5) | 11 | 24.0 (7.0, 31.0)               | 21 | 0.390   |
| Delta eGFR 12 months | 22.5 (8.0, 36.5)  | 76 | 23.0 (12.0, 38.0)              | 47 | 11.0 (6.0, 25.0)  | 9  | 23.0 (7.0, 36.0)               | 20 | 0.424   |

#### D. Sclerotic class

| Patient cohort       | Total             | n  | CYC                            | n  | RTX               | n  | RTX-CYC           | n | P-value |
|----------------------|-------------------|----|--------------------------------|----|-------------------|----|-------------------|---|---------|
| Baseline eGFR        | 19.0 (12.8, 24.2) | 36 | 20.0 (13.8, 27.2)              | 22 | 17.5 (11.0, 24.0) | 12 | 12.0 (8.5, 15.5)  | 2 | 0.513   |
| 6-months eGFR        | 18.5 (11.8, 28.0) | 28 | 23.0 (16.8, 27.8)              | 16 | 14.0 (5.0, 28.0)  | 10 | 10.5 (7.8, 13.2)  | 2 | 0.276   |
| 12-months eGFR       | 22.5 (17.0, 29.2) | 26 | 25.0 (17.2, 37.5) <sup>#</sup> | 18 | 17.0 (8.5, 25.0)  | 7  | 19.0 (19.0, 19.0) | 1 | 0.407   |
| Delta eGFR 6 months  | 0.5 (-1.2, 9.0)   | 28 | 3.5 (-0.2, 11.0)               | 16 | 0.5 (-1.5, 7.8)   | 10 | -1.5 (-2.2, -0.8) | 2 | 0.469   |
| Delta eGFR 12 months | 2.0 (-0.8, 9.2)   | 26 | 5.5 (0.0, 13.0)                | 18 | 0.0 (-4.0, 1.0)   | 7  | 0.0 (0.0, 0.0)    | 1 | 0.058   |

Abbreviations: CYC: cyclophosphamide; eGFR: estimated glomerular filtration rate; RTX: rituximab; RTX-CYC: Rituximab plus Cyclophosphamide  
\*P value < 0,05 RTX vs CYC; <sup>#</sup>P value < 0,05 RTX vs RTX-CYC; <sup>°</sup>P value < 0,05 CYC vs RTX-CYC.

### Supplementary Table S4: Multivariable logistic regression model predicting eGFR recovery 6 months after induction therapy

Clinically relevant variables with missing data <10% were included as predictors. Missing data were imputed and model estimates were pooled using Rubin's rules, as detailed in the Methods. P values for categorical variables with more than two categories refer to pooled likelihood ratio tests.

| Variable                                      | Odds Ratio (95% CI) | p-value |
|-----------------------------------------------|---------------------|---------|
| Age at baseline (10 years)                    | 0.48 (0.37-0.64)    | < 0.001 |
| Male sex (reference: female)                  | 1.45 (0.77-2.72)    | 0.248   |
| Baseline eGFR (10 ml/min/1.73m <sup>2</sup> ) | 0.55 (0.45-0.67)    | < 0.001 |
| PR3 ANCA-positivity                           | 0.67 (0.26-1.72)    | 0.399   |
| GPA (reference: MPA)                          | 1.31 (0.49-3.49)    | 0.588   |
| Berden class                                  |                     | <0.001  |
| Mixed vs focal                                | 0.26 (0.10-0.65)    | 0.004   |
| Crescentic vs focal                           | 0.69 (0.27-1.76)    | 0.432   |
| Sclerotic vs focal                            | 0.07 (0.02-0.26)    | <0.001  |
| Mixed vs crescentic                           | 0.38 (0.18-0.81)    | 0.012   |
| Sclerotic vs crescentic                       | 0.10 (0.03-0.33)    | <0.001  |
| Mixed vs sclerotic                            | 3.81 (1.20-12.05)   | 0.023   |
| Induction therapy                             |                     | 0.506   |
| RTX vs CYC                                    | 0.59 (0.23-1.48)    | 0.256   |
| RTX-CYC vs CYC                                | 0.98 (0.43-2.22)    | 0.964   |
| RTX vs RTX-CYC                                | 0.60 (0.20-1.80)    | 0.359   |
| IV glucocorticoids                            | 1.68 (0.79 -3.56)   | 0.174   |

Abbreviations: CI: confidence interval; CYC: cyclophosphamide; eGFR: estimated glomerular filtration rate; GPA: granulomatosis with polyangiitis; IV: intravenous; MPA: microscopic polyangiitis; RTX: rituximab; RTX-CYC: Rituximab plus Cyclophosphamide

## Supplementary Table S5: Multivariable Firth's penalized logistic regression models to predict eGFR recovery in patient subgroups by Berden class

Separate models were developed for each subgroup by Berden class, using the same set of predictors. Tables report odds ratios (OR), 95% confidence intervals (CI) and the respective p-values. Missing data were imputed and model estimates were pooled using Rubin's rules, as detailed in the Methods.

### A. Focal class

|                   | OR   | 95% CI     | p-value |
|-------------------|------|------------|---------|
| age (10 years)    | 0.51 | 0.27-0.96  | 0.038   |
| eGFR (10 ml/min)  | 0.47 | 0.31-0.71  | <0.001  |
| Induction therapy |      |            |         |
| RTX vs CYC        | 2.14 | 0.28-16.41 | 0.457   |
| RTX-CYC vs CYC    | 2.76 | 0.52-14.64 | 0.228   |
| RTX vs RTX-CYC    | 0.78 | 0.08-7.20  | 0.820   |
| IV steroids       | 2.15 | 0.53-8.74  | 0.280   |

### B. Mixed class

|                   | OR   | 95% CI    | p-value |
|-------------------|------|-----------|---------|
| age (10 years)    | 0.57 | 0.37-0.87 | 0.009   |
| eGFR (10 ml/min)  | 0.64 | 0.44-0.94 | 0.023   |
| Induction therapy |      |           |         |
| RTX vs CYC        | 0.64 | 0.15-2.73 | 0.538   |
| RTX-CYC vs CYC    | 0.50 | 0.14-1.81 | 0.289   |
| RTX vs RTX-CYC    | 1.27 | 0.24-6.54 | 0.775   |
| IV steroids       | 0.88 | 0.28-2.82 | 0.831   |

### C. Crescentic class

|                   | OR   | 95% CI    | p-value |
|-------------------|------|-----------|---------|
| age (10 years)    | 0.57 | 0.37-0.88 | 0.011   |
| eGFR (10 ml/min)  | 0.59 | 0.43-0.80 | <0.001  |
| Induction therapy |      |           |         |
| RTX vs CYC        | 0.23 | 0.05-0.98 | 0.047   |
| RTX-CYC vs CYC    | 1.16 | 0.27-4.94 | 0.84    |
| RTX vs RTX-CYC    | 0.20 | 0.03-1.19 | 0.077   |
| IV steroids       | 1.90 | 0.50-7.21 | 0.340   |

#### D. Sclerotic class

|                   | OR   | 95% CI     | p-value |
|-------------------|------|------------|---------|
| age (10 years)    | 0.52 | 0.27-0.99  | 0.047   |
| eGFR (10 ml/min)  | 1.21 | 0.61-2.39  | 0.574   |
| Induction therapy |      |            |         |
| RTX vs CYC        | 0.30 | 0.02-4.26  | 0.355   |
| RTX-CYC vs CYC    | 0.99 | 0.03-28.74 | 0.996   |
| RTX vs RTX-CYC    | 0.30 | 0.00-18.00 | 0.548   |
| IV steroids       | 2.55 | 0.14-45.31 | 0.507   |

Abbreviations: CI: confidence interval; CYC: cyclophosphamide; eGFR: estimated glomerular filtration rate; IV: intravenous; RTX: rituximab; RTX-CYC: Rituximab plus Cyclophosphamide

## Supplementary Table S6: Multivariable Cox regression model with Firth's penalized partial likelihood predicting the kidney failure outcome

Missing data were imputed and model estimates were pooled using Rubin's rules, as detailed in the Methods.

| Variable                                     | Hazard Ratio (95% CI) | P-value |
|----------------------------------------------|-----------------------|---------|
| Age at baseline (10 years)                   | 0.98 (0.79-1.20)      | 0.827   |
| Male sex (reference: female)                 | 1.06 (0.62-1.79)      | 0.836   |
| Baseline GFR (10 ml/min/1.73m <sup>2</sup> ) | 0.52 (0.39-0.70)      | <0.001  |
| PR3 ANCA-positivity                          | 1.23 (0.56-2.71)      | 0.605   |
| GPA (reference: MPA)                         | 0.76 (0.31-1.86)      | 0.549   |
| Berden class                                 |                       |         |
| Mixed vs focal                               | 2.82 (0.88-9.03)      | 0.081   |
| Crescentic vs focal                          | 2.10 (0.64-6.89)      | 0.219   |
| Sclerotic vs focal                           | 5.76 (1.70-19.45)     | 0.005   |
| Mixed vs crescentic                          | 1.34 (0.71-2.53)      | 0.364   |
| Sclerotic vs crescentic                      | 2.74 (1.29-5.80)      | 0.009   |
| Mixed vs sclerotic                           | 0.49 (0.23-1.02)      | 0.056   |
| Therapy                                      |                       |         |
| RTX vs CYC                                   | 1.88 (0.93-3.83)      | 0.080   |
| RTX-CYC vs CYC                               | 0.99 (0.45-2.18)      | 0.982   |
| RTX vs RTX-CYC                               | 1.90 (0.73-4.93)      | 0.186   |
| IV glucocorticoids                           | 0.82 (0.43-1.54)      | 0.530   |

Abbreviations: CI: confidence interval; CYC: cyclophosphamide; eGFR: estimated glomerular filtration rate; GPA: granulomatosis with polyangiitis; IV: intravenous; MPA: microscopic polyangiitis; RTX: rituximab; RTX-CYC: Rituximab plus Cyclophosphamide

## Supplementary Table S7: Multivariable Cox regression models with Firth's penalized partial likelihood to predict kidney failure in patient subgroups by Berden class

Separate models were developed for each subgroup by Berden class, using the same set of predictors. Tables report hazard ratios (HR), 95% confidence intervals (CI) and the respective p-values. Missing data were imputed and model estimates were pooled using Rubin's rules, as detailed in the Methods.

Modelling in the focal class was not done due to the low number of events (n=3 events)

### Mixed class

|                   | HR   | 95% CI    | p-value |
|-------------------|------|-----------|---------|
| eGFR (10 ml/min)  | 0.38 | 0.22-0.67 | <0.001  |
| Induction therapy |      |           |         |
| RTX vs CYC        | 2.21 | 0.69-7.05 | 0.178   |
| RTX-CYC vs CYC    | 1.51 | 0.47-4.86 | 0.490   |
| RTX vs RTX-CYC    | 1.47 | 0.34-6.29 | 0.601   |
| IV steroids       | 1.14 | 0.38-3.45 | 0.807   |

### Crescentic class

|                   | HR   | 95% CI     | p-value |
|-------------------|------|------------|---------|
| eGFR (10 ml/min)  | 0.56 | 0.34-0.93  | 0.026   |
| Induction therapy |      |            |         |
| RTX vs CYC        | 3.42 | 1.03-11.35 | 0.045   |
| RTX-CYC vs CYC    | 0.64 | 0.14-2.99  | 0.568   |
| RTX vs RTX-CYC    | 5.33 | 0.91-31.18 | 0.063   |
| IV steroids       | 0.65 | 0.21-1.94  | 0.430   |

### Sclerotic class

|                   | HR   | 95% CI     | p-value |
|-------------------|------|------------|---------|
| eGFR (10 ml/min)  | 0.33 | 0.14-0.76  | 0.011   |
| Induction therapy |      |            |         |
| RTX vs CYC        | 0.91 | 0.17-4.83  | 0.909   |
| RTX-CYC vs CYC    | 1.46 | 0.17-12.38 | 0.723   |
| RTX vs RTX-CYC    | 0.62 | 0.08-4.88  | 0.644   |
| IV steroids       | 0.28 | 0.05-1.53  | 0.136   |

Abbreviations: CI: confidence interval; CYC: cyclophosphamide; eGFR: estimated glomerular filtration rate; IV: intravenous; RTX: rituximab; RTX-CYC: Rituximab plus Cyclophosphamide

### Supplementary Figure S1: Proportions of kidney remission rates at 6 months according to induction immunosuppression in subgroups stratified by Berden histopathological classes

Bars represent proportions, with absolute counts shown as numbers superimposed on each segment. P values refer to Fisher's exact test.

Abbreviations: CYC: cyclophosphamide; RTX: rituximab; RTX-CYC: Rituximab plus Cyclophosphamide

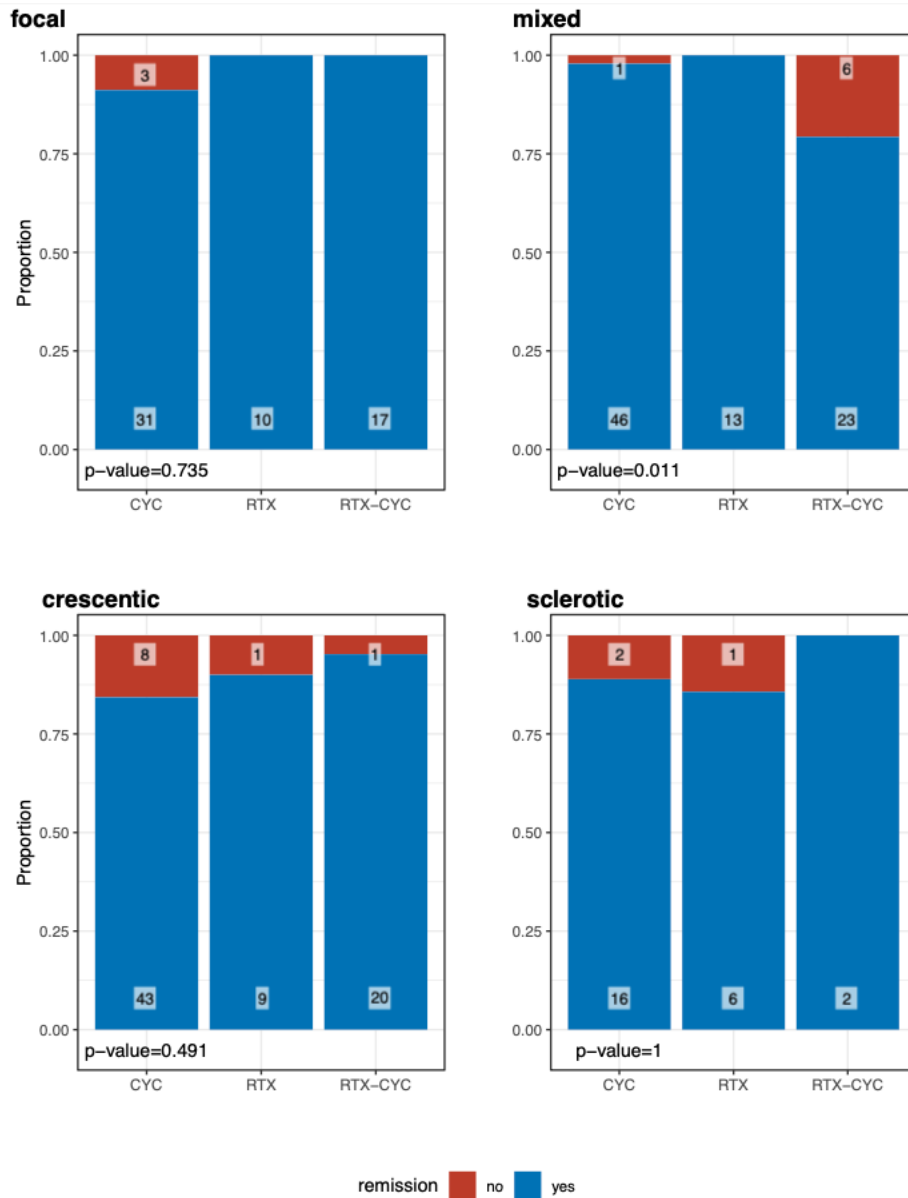

### Supplementary Figure S2: eGFR at baseline, 6 and 12 months after induction in the cohort stratified by Berden histopathological classes

Dots indicate medians and lines refer to IQR of eGFR values (ml/min per 1.73 m<sup>2</sup>).

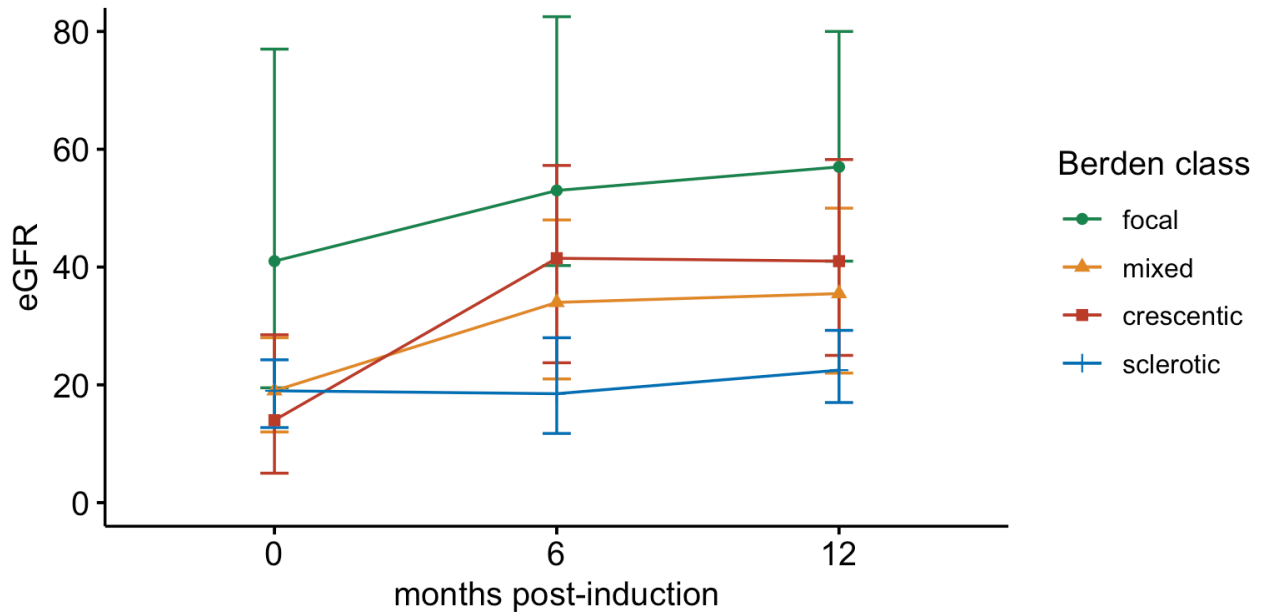

**Supplementary Figure S3: Kaplan Meier curves showing time to the kidney failure outcome in the cohort stratified by Berden histopathological classes**

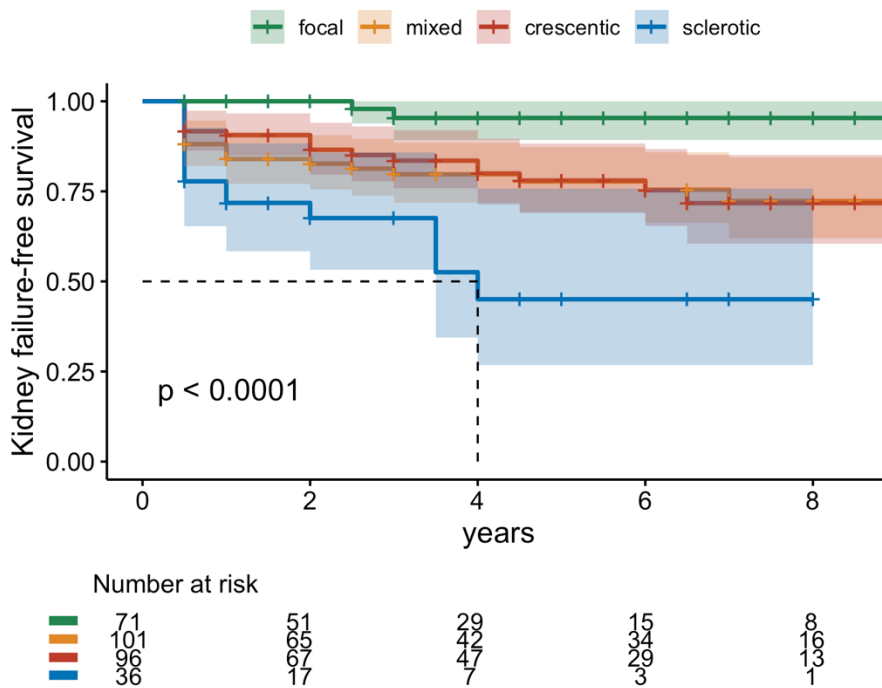

P value refers to overall log-rank test p-value.

Pairwise comparisons using log-rank test:

focal vs. mixed:  $p=0.002$

focal vs. crescentic:  $p=0.005$

focal vs. sclerotic:  $p<0.001$

crescentic vs. mixed:  $p=0.846$

crescentic vs. sclerotic:  $p=0.003$

sclerotic vs. mixed:  $p=0.015$
